# Supplementary material for: WNT16 Influences Bone Mineral Density, Cortical Bone Thickness, Bone Strength, and Osteoporotic Fracture Risk
Source: PubMed Central journal article supplement (PMC3390364; doi:10.1371/journal.pgen.1002745), 2012-07-05

### Supplementary Figure S6

Scatter plots of the observed association of 7q31 locus with forearm BMD after condition on the top SNP rs2536189. The P values of SNPs (shown as  $-\log_{10}$  values in y-axis, from the genome-wide single-marker association analysis using the linear regression model) are plotted against their map position (b36) (x-axis).

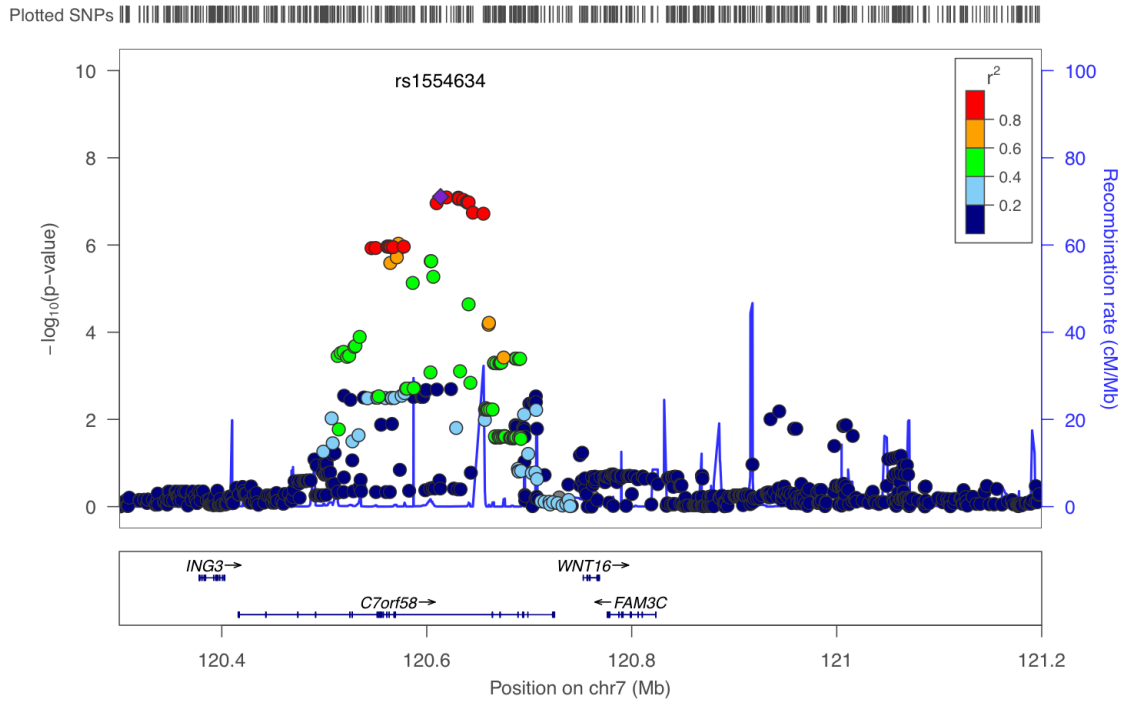

Supplement: pgen.1002745.s006.pdf [file pgen.1002745.s006.pdf]
